# Supplementary material for: Lysosomal damage drives mitochondrial proteome remodelling and reprograms macrophage immunometabolism
Source: PubMed Central journal article supplement (PMC9705561; doi:10.1038/s41467-022-34632-8), 2022-11-28
Supplement: 41467_2022_34632_MOESM1_ESM.pdf [file 41467_2022_34632_MOESM1_ESM.pdf]

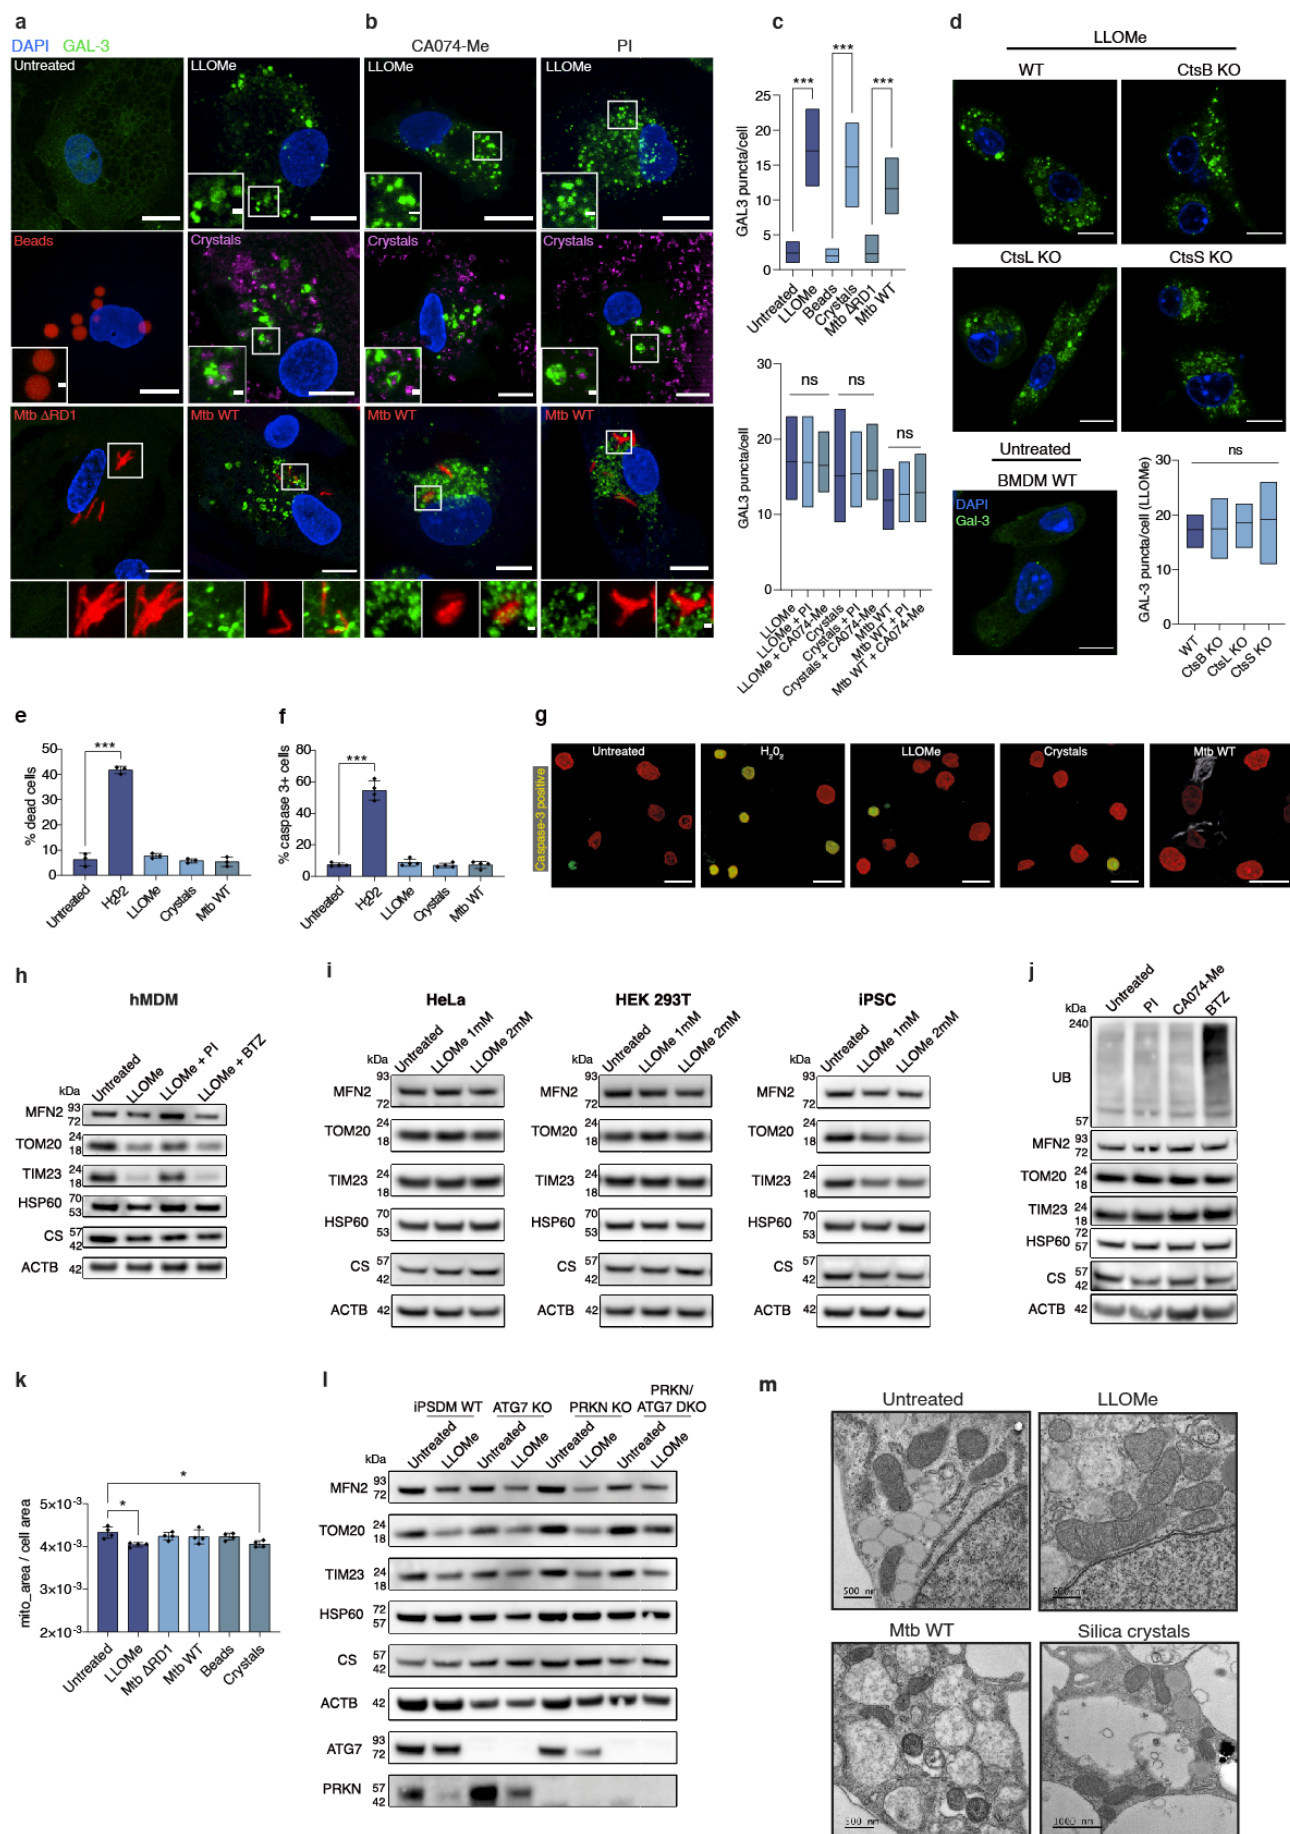

### **Supplementary Figure 1- Supplementary data related to Figure 1.**

**(a)** iPSDM stimulated with 0.5 mM LLOMe for 1 h, 100 ug/mL silica crystals or beads for 3 h or infected with Mtb WT or Mtb  $\Delta$ RD1 for 48 h.  $n = 3$  independent experiments **(b)** Same conditions as in (a) but co-treated with the indicated protease inhibitors. **(c)** Quantitative analysis of Galectin-3 (Gal-3) puncta by confocal imaging. At least 40 cells were counted per condition. **(d)** BMM WT, CtsB KO, CtsL KO and CtsS KO were stimulated with 0.5 mM LLOMe for 1 h and Gal-3 puncta evaluated by confocal imaging. At least 30 cells were counted per condition. **(e, f)** iPSDM were stimulated with 0.5mM LLOMe for 1 h, 100 ug/mL silica crystals for 3 h or infected with Mtb WT for 48 h and cellular viability evaluated using a Cell Viability Imaging Kit (e) or a Caspase-3 assay kit (f). 1 mM  $H_2O_2$  for 1h was used as a positive control. **(g)** Representative images from one out of three independent experiments showing iPSDM stained with Caspase-3 assay kit (Caspase-3+ nuclei shown in yellow). **(h)** Immunoblot for MFN2, TOM20, TIM23, HSP60 and Citrate synthase (CS) in primary human blood monocyte-derived macrophages left untreated or treated with 0.5 mM LLOMe for 1h in presence or absence of PI or BTZ. ACTB levels were used as loading controls (repeated three times with similar results). **(i)** Immunoblot for mitochondrial proteins in HeLa, HEK 293T cells and Eika2 iPSC treated or not with LLOMe for 6 h at the indicated concentrations (repeated three times with similar results). **(j)** Immunoblot for total ubiquitin (UB) and mitochondrial proteins in iPSDM incubated in the presence or absence of 1:400 protease inhibitors, 50 uM CA074-Me, or 5 nM bortezomib for 1 h (repeated three times with similar results). **(k)** Quantitative analysis of mitochondrial area normalized to cellular area in iPSDM after the indicated conditions. At least 700 cells were counted per condition. **(l)** Western blot analysis of mitochondrial proteins in iPSDM WT, ATG7 KO, PRKN KO and PRKN/ATG7 DKO stimulated with 0.5 mM LLOMe for 1 h. Actin (ACTB) levels were used as loading controls. **(m)** Representative electron micrographs of Mtb WT-infected, silica crystals and LLOMe-treated macrophages. No mitochondrial derived vesicles (MDV) were detected. Mitochondria counted per condition from at least 19 cells; untreated: 149, LLOMe-treated: 121, Mtb WT infected: 177 and Silica crystals-treated: 149. Data represent the mean  $\pm$  SEM of three independent biological replicates. A one-way ANOVA and Tukey post-test was used for multiple comparisons.  $**p \leq 0.01$ ;  $***p \leq 0.001$ . Images shown are z-stack projections. Scale bars, 10  $\mu$ m and 1  $\mu$ m for images and zoom-in, respectively. Unprocessed blots and Source data are provided as a Source Data file.

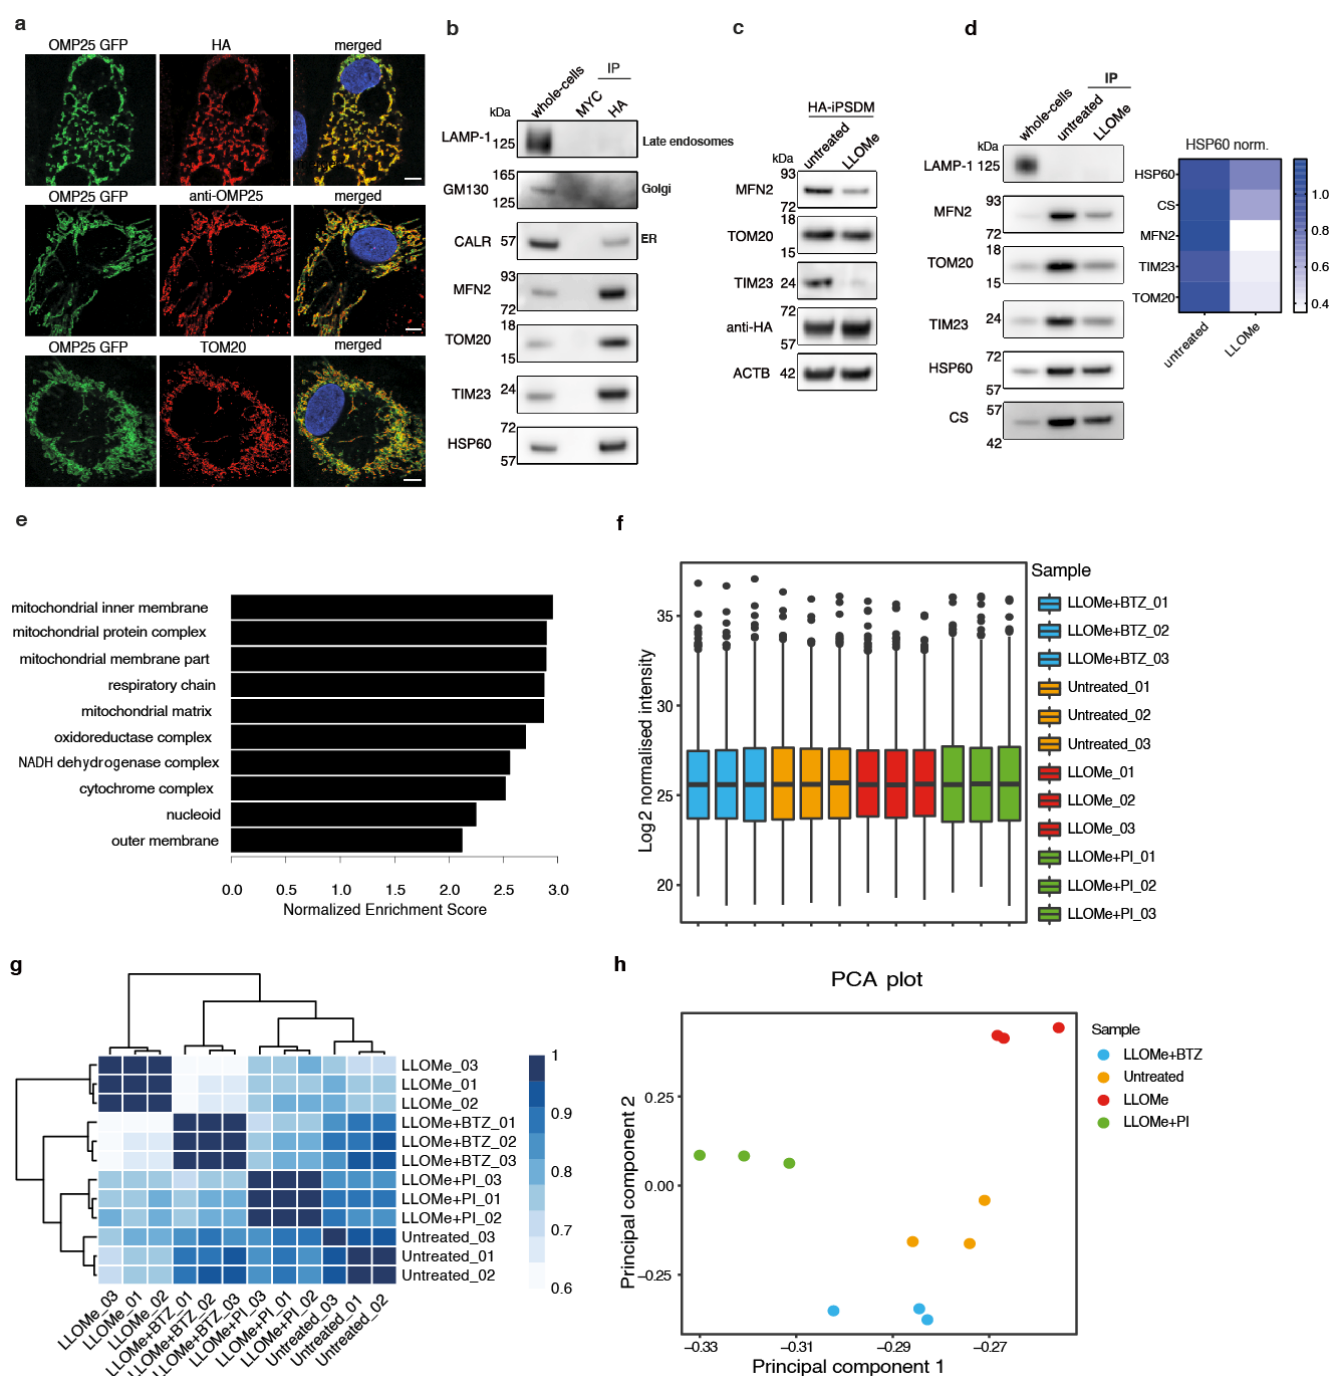

**Supplementary Figure 2. Quality control of label-free proteomics data generated from mitochondria isolated by high affinity immunopurification in iPSDM.** (a) Representative images of iPSDM expressing 3XHA-EGFP-OMP25 and immunostained with anti-HA, anti-OMP25 and anti-TOM20 specific antibodies  $n = 25$  cells examined per condition. (b) Immunoblot for selected organelle markers in iPSDM whole cell lysates or mitochondrial pulldowns using anti-HA beads from iPSDM expressing 3XHA-EGFP-OMP25 or 3XMYC-EGFP-OMP25 (repeated three times with similar results). (c) Immunoblot for mitochondrial proteins in iPSDM expressing 3XHA-EGFP-OMP25 treated or not with 0.5 mM LLOMe for 1h (repeated three times with similar results). (d) Immunoblot of MITO-tag pulldowns from

iPSDM expressing 3XHA-EGFP-OMP25 treated or not with 0.5 mM LLOMe for 1h. Mitochondrial protein levels were normalized to HSP60 levels from untreated macrophages (heatmap). A whole-cell lysate of untreated iPSDM was run as a control (repeated three times with similar results). **(e)** Gene Set Enrichment Analysis (GSEA) of quantitative proteomics data from HA pulldowns on 3XHA-EGFP-OMP25 versus HA pulldowns on 3xMYC-EGFP-OMP25-expressing iPSDM under control conditions. The 3XMYC-EGFP-OMP25-expressing iPSDM served as a negative control in our analysis, and protein lists were ranked based log<sub>2</sub> fold change. GSEA of GO cellular components was performed using WebGestalt. **(f)** Boxplots of normalised log<sub>2</sub>-transformed intensities from mitochondrial immunoprecipitations (Mito-IP) before comparison between treatment groups. Plots visualise the mean, with the box bounds showing the 25th and 75th percentiles and the whiskers the 5th and 95th percentile. **(g)** Correlogram of Pearson correlation coefficients of log<sub>2</sub>-transformed intensities from the different treatments and replicates used in the Mito-IP analysis. **(h)** Principal component analysis of log<sub>2</sub>-transformed intensities from the different samples used during the Mito-IP analysis. n=3 independent experiments. Scale bars, 10  $\mu$ m. Unprocessed blots and Source data are provided as a Source Data file. See also Supplementary Table 1.



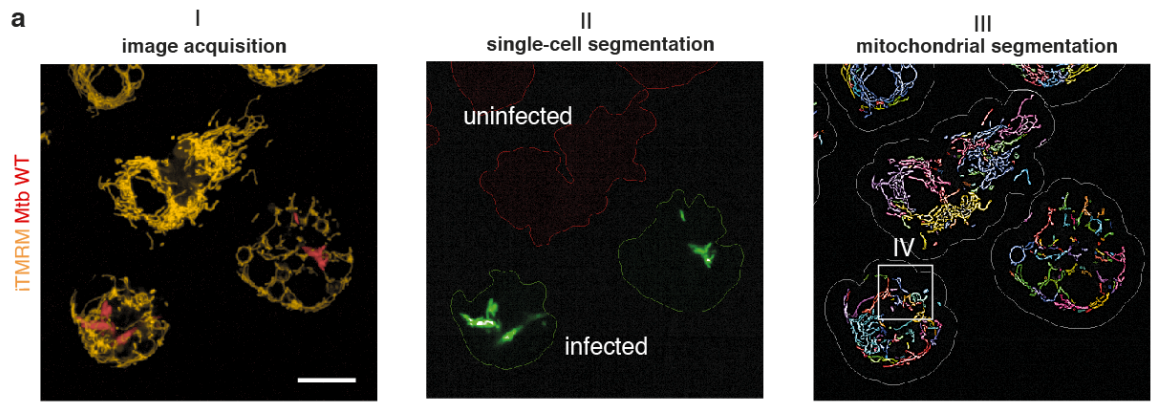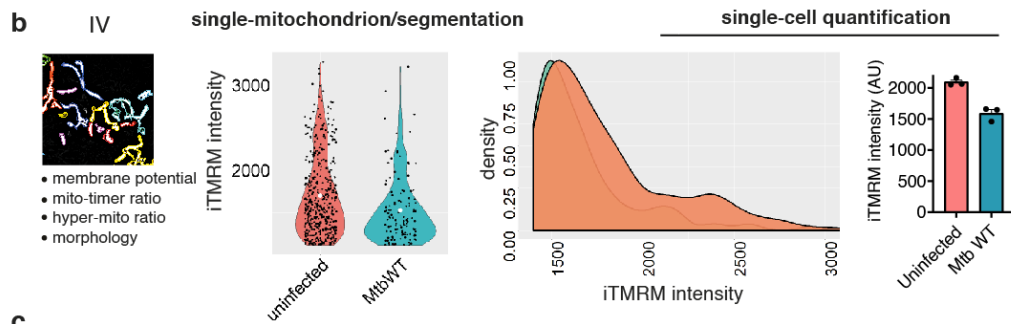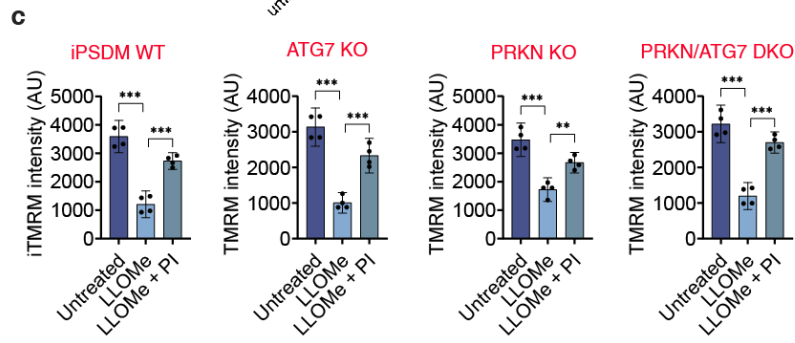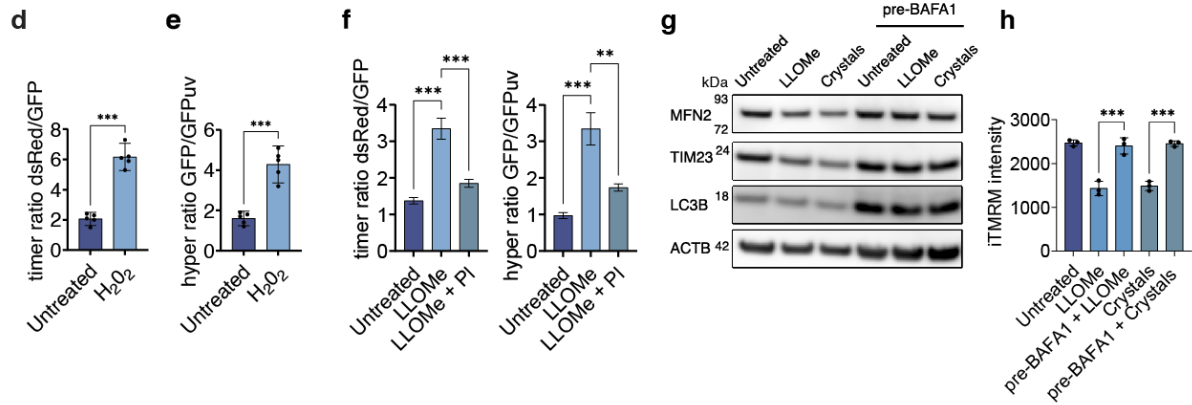

**Supplementary Figure 3. Supplementary data related to Figures 3.** (a) Representative segmentation strategy using Harmony software (I to IV) in iPSDM is shown to illustrate the mitochondrial analysis pipeline using single-cell high-content imaging. Images shown are z-stack projections. (b) Parameters measured by the high content approach and representation of the mitochondrial heterogeneity per condition and intensity distribution in cells. (c) Quantification of iTMRM intensity in iPSDM WT, ATG7 KO, PRKN KO and PRKN/ATG7 DKO. Data represent the mean  $\pm$  SEM of three independent biological replicates. One-way ANOVA and Tukey post-test was used for multiple comparisons. (d) iPSDM expressing mitoTimer were treated or not with 100  $\mu$ M H<sub>2</sub>O<sub>2</sub> for 2 h. The dsRed/GFP ratios were quantified by high-content imaging. (e) iPSDM expressing Hyper-Mito (pHyPer-dMito) were treated or not with 100  $\mu$ M H<sub>2</sub>O<sub>2</sub> for 1h. The GFPuv/GFP ratios were quantified by high-content imaging. At least 300 cells were counted per condition. An unpaired two-tail t-test test was used for comparisons. (f) iPSDM expressing mitoTimer or Hyper-Mito were left untreated or treated with LLOMe (0.5 mM, 1h) and incubated in the presence or absence of a protease inhibitor (PI). (g,h) iPSDM were incubated in the presence or the absence of Bafilomycin A1 (BAFA1) (100 nM, 2h) and treated with LLOMe (0.5 mM, 1h) or silica crystals (100  $\mu$ g/mL, 3h). Mitochondrial protein levels were evaluated by WB (g) and iTMRM (h) intensity evaluated by high-content single-cell microscopy. Data represent mean  $\pm$  SEM of three independent biological experiments. \*\*p  $\leq$  0.01; \*\*\*p  $\leq$  0.001. Images shown are z-stack projections. Scale bars, 10  $\mu$ m. Unprocessed blots and Source data are provided as a Source Data file.

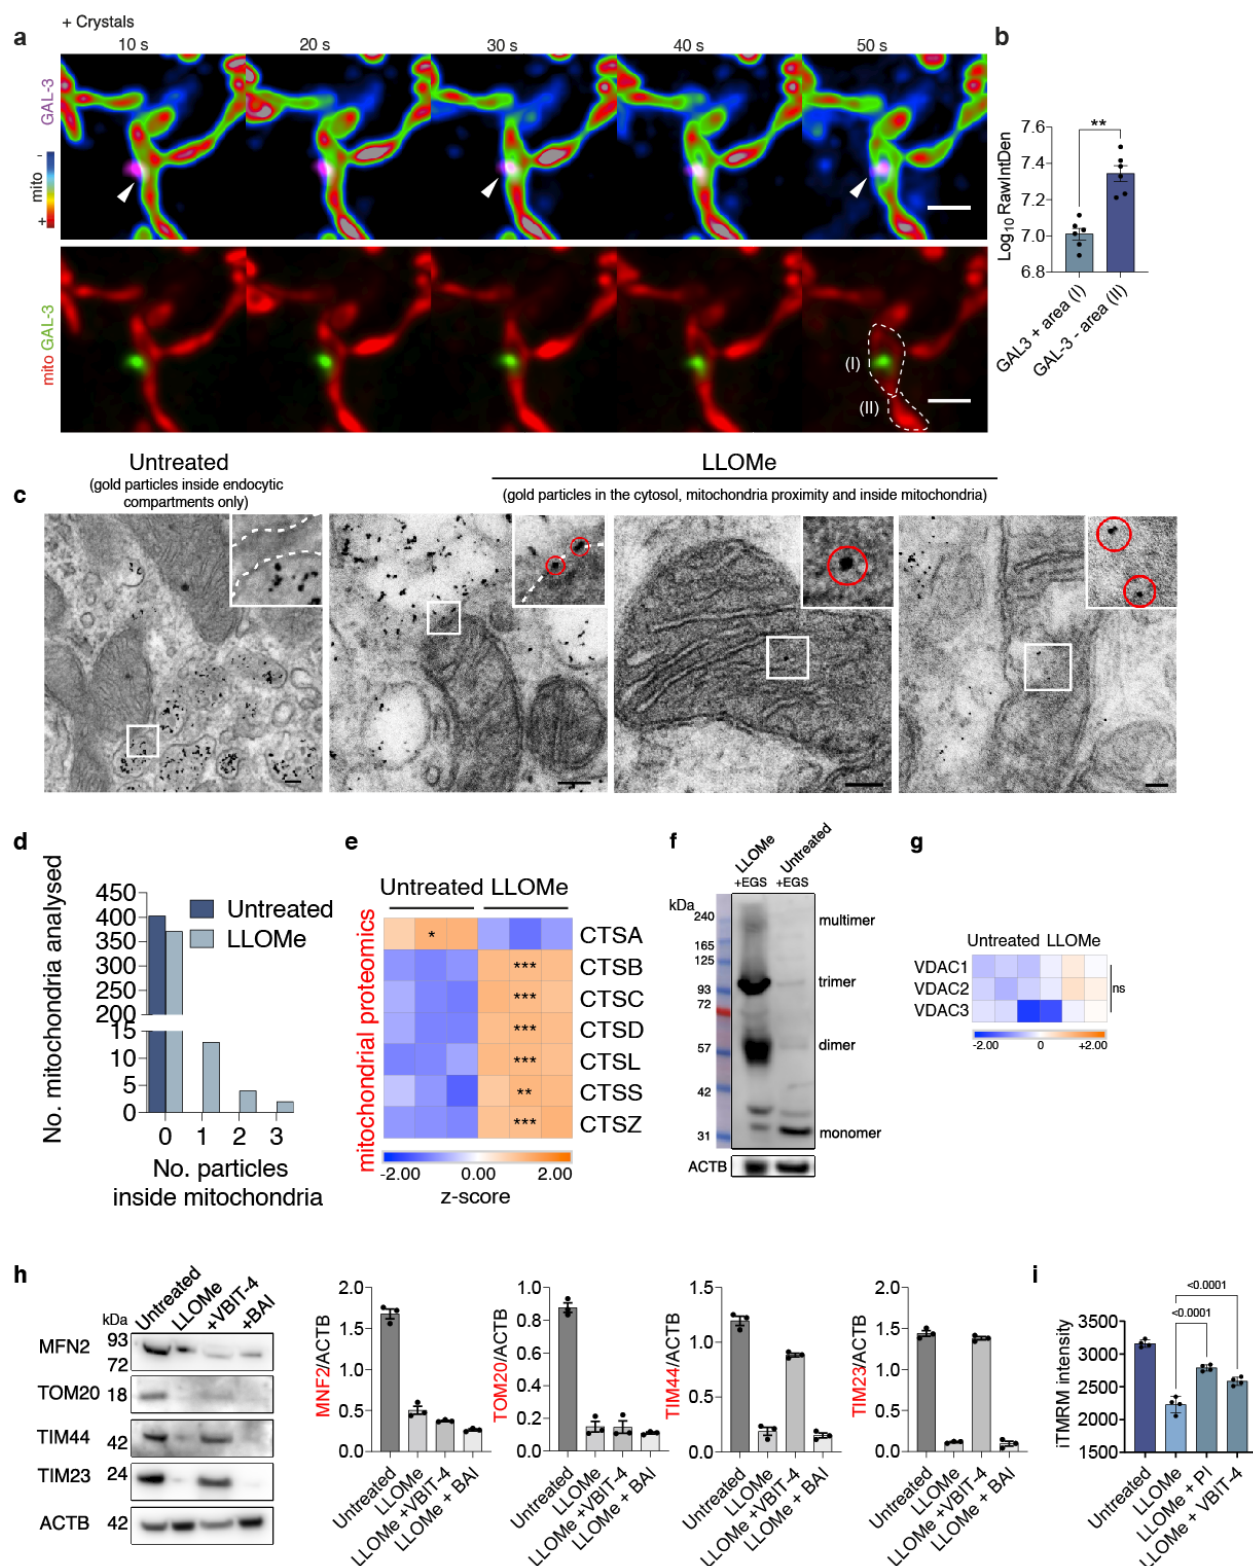

**Supplementary Figure 4. Supplementary data related to Figure 4.**

(a) iPSDM expressing GAL-3-RFP and incubated with MitoTracker Deep Red were treated with 100ug/mL of silica crystals and imaged immediately after stimulation at 1 frame per 10 s. A selected sequence showing a GAL-3 positive vesicle in proximity of mitochondria is shown. (b) MitoTracker Deep Red intensity quantification of mitochondrial areas in contact with GAL-

3- positive vesicles or without interaction (GAL-3-negative), illustrated as “I” and “II”, respectively. Bar plots show data mean values  $\pm$  SEM from one out of three independent experiments with  $n = 12$  events per condition. **(c)** Representative electron micrographs of iPSDM incubated with 5nm gold particles and left untreated or treated with 0.5 mM of LLOMe for 1 h.  $n = 88$  cells examined per condition over three independent experiments. **(d)** Quantification of nanogold particles detected per mitochondrion in the indicated conditions. **(e)** Heatmap indicating z-score values of lysosomal cathepsins significantly increased in the MITO-tag pulldown from iPSDM untreated or treated with LLOMe. **(f)** VDAC oligomerisation evaluated by WB in iPSDM left untreated or treated with LLOMe (0.5 mM, 1h). **(g)** Heatmap with z-score values showing VDAC1, VDAC2 and VDAC3 protein levels. **(h)** mitochondrial protein levels of iPSDM pre-incubated with VBIT-4 (10  $\mu$ M, 6h) or BAI (2  $\mu$ M, 6 h). Bar plots show the respective protein levels relative to ACTB from three independent experiments. **(i)** iTMRM intensity levels in iPSDM left untreated or treated with LLOMe and incubated with VBIT-4 or with a protease inhibitor cocktail (PI). Unprocessed blots and Source data are provided as a Source Data file.

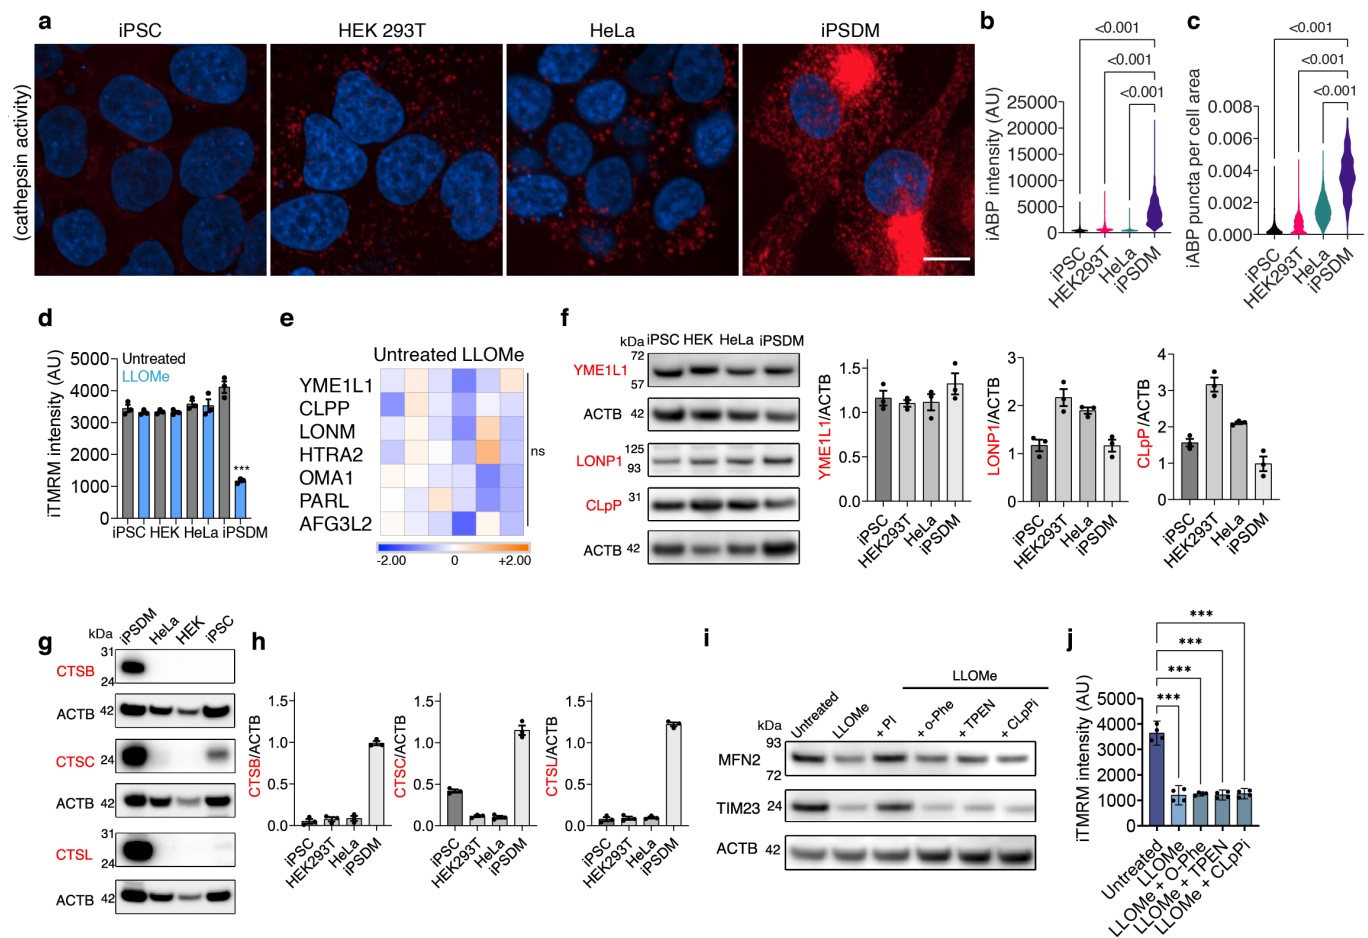

**Supplementary Figure 5. Supplementary data related to Figure 4.**

(a) representative images of iPSC, HEK293T, HeLa cells and iPSCDM incubated for 3h with the cathepsin activity-based probe iABP (1uM),  $n = 3$  independent experiments with at least 300 cells evaluated per condition. (b, c) high-content single-cell quantification of iABP lysosomal intensity (b) and iABP puncta per area of cell (c). Results are representative of one out of three independent experiments with at least 300 cells evaluated per condition. One-way ANOVA and Tukey post-test was used for multiple comparisons. (d) iTMRM intensity evaluation in the indicated cell types after 6h of LLOMe 1mM (iPSC, HEK293T, HeLa) or after 1h of LLOMe 0.5mM (iPSCDM). (e) Heatmap with z-score values showing mitoproteases protein levels. (f) YME1L1, LONP1 and CLpP protein levels were evaluated by WB in iPSCDM, HeLa, HEK293T and iPSC. Bar plots show protein levels relative to ACTB,  $n = 3$  independent experiments. (g) active cathepsin B, C and L protein levels were evaluated by WB in iPSCDM, HeLa, HEK293T and iPSC (h) bar plots show protein levels relative to ACTB,  $n = 3$  independent experiments. (i, j) iPSCDM incubated in the presence or the absence of the selective mitochondrial protease inhibitors 1,10-phenanthroline (o-Phe) (1mM, 6 h), TPEN (0.2 mM, 6 h) or A2-32-01 (CLpPi) (50 um, 6 h) and treated with LLOMe (0.5mM, 1 h). The protease inhibitor (PI) treatment was done simultaneously with LLOMe as described before. After that, mitochondrial protein levels were evaluated by WB (i) and iTMRM intensity analysed by high-content single-cell microscopy (j). Bar plots represent mean  $\pm$  SEM of three

independent biological experiments. Unprocessed blots and Source data are provided as a Source Data file.



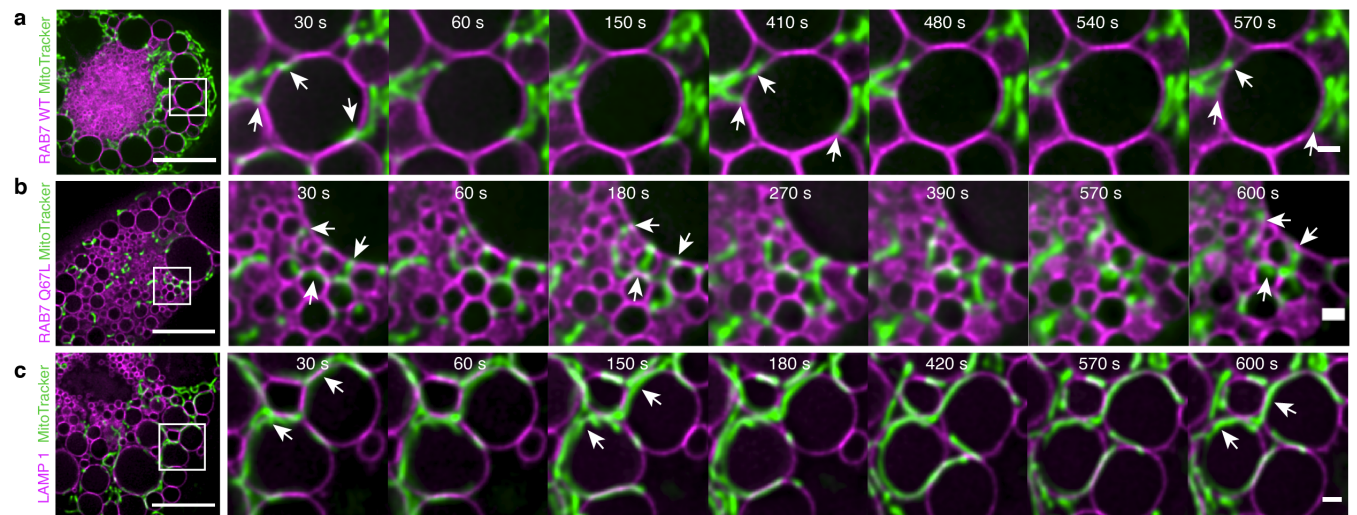

**Supplementary Figure 6. Supplementary data related mitochondria-lysosome interaction analysis shown in Figure 4.**

**(a-c)** Live-cell super-resolution imaging (30 s time frame) of iPSDM transiently expressing RAB7 WT GFP (a), RAB7(Q67L) GFP (b) or LAMP1-mNeonGreen (c) and incubated with MitoTracker Deep Red. Arrows indicate mitochondria (M) - lysosome (L) contacts. Scale bars: 10  $\mu\text{m}$  and 1  $\mu\text{m}$  for images and zoom-in, respectively. Source data are provided as a Source Data file.

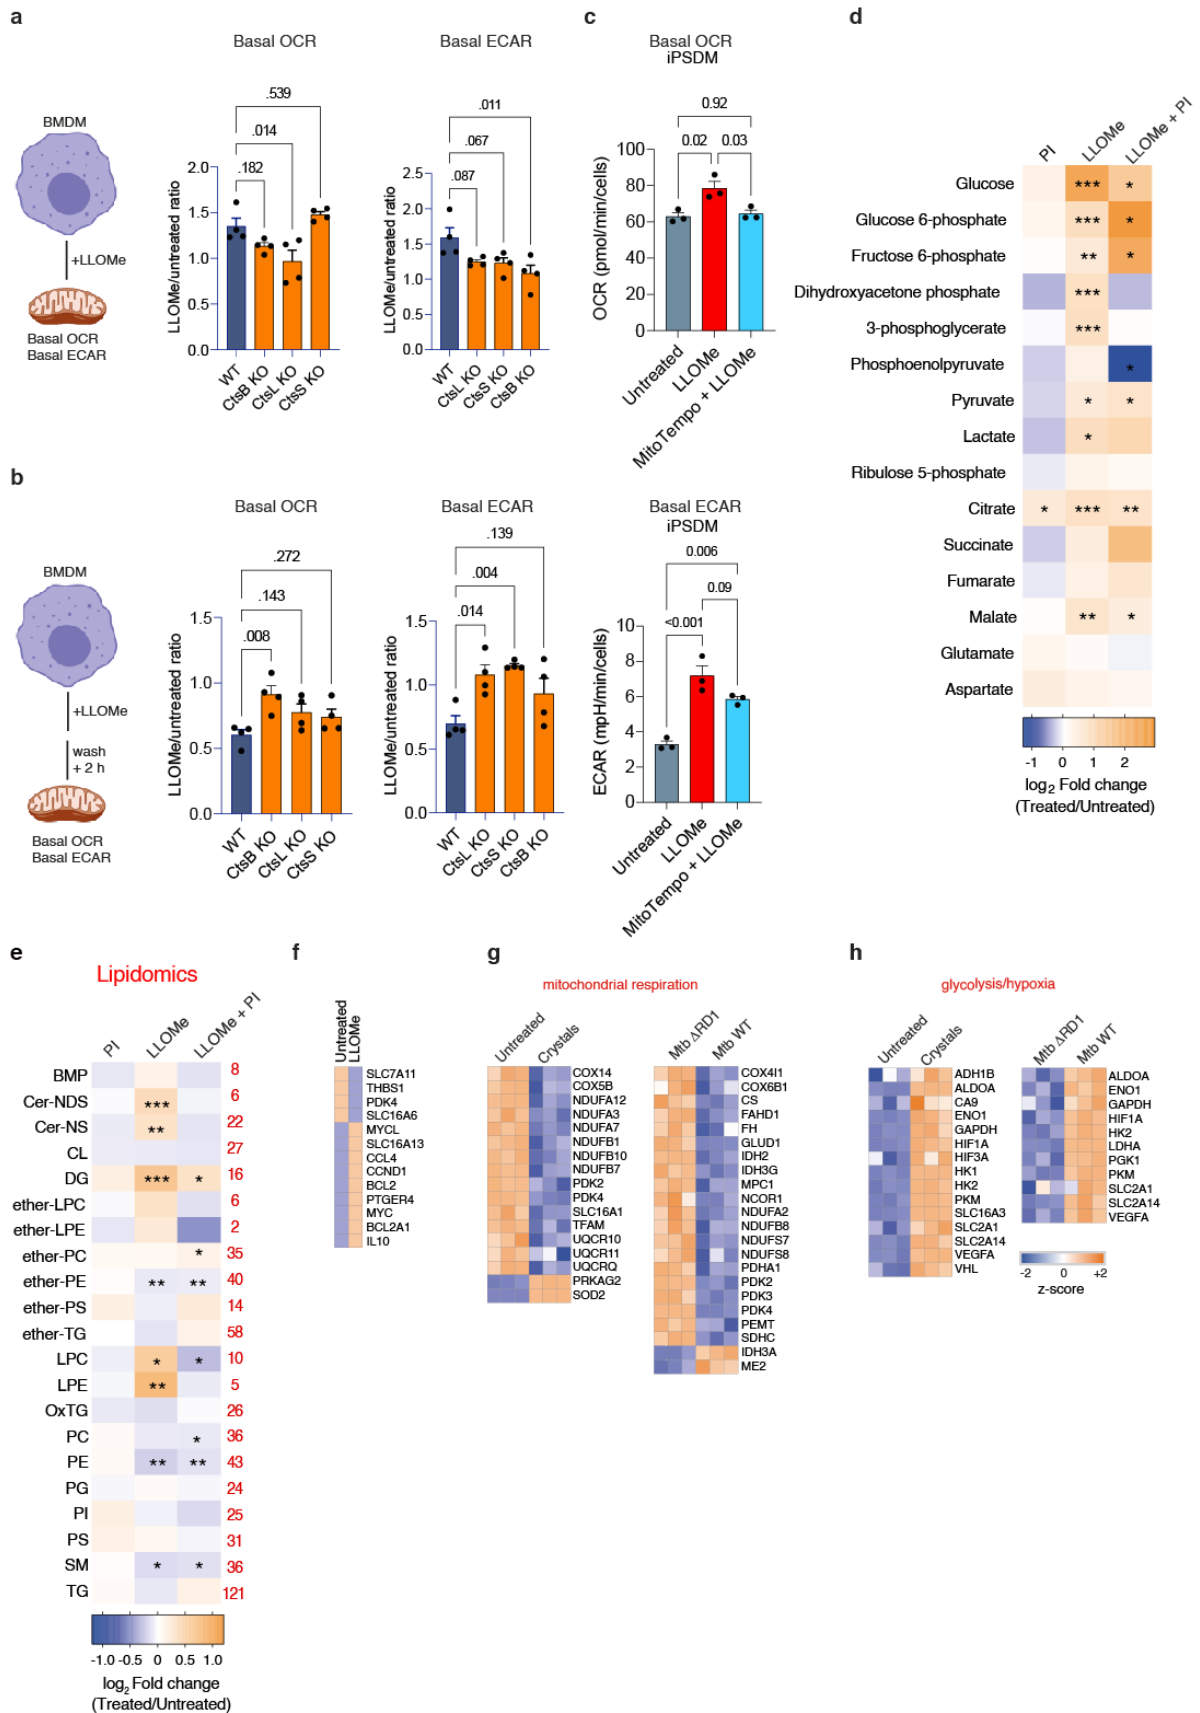

**Supplementary Figure 7. Lysosomal leakage affects macrophage metabolism.**

(a) Bar graphs show the ratio LLOMe vs untreated of basal OCR and ECAR values of BMDM WT, CtsB KO, CtsL KO and CtsS KO stimulated with 0.5 mM of LLOMe for 1 h. (b) BMDM

were treated as in A but ECAR and OCR evaluation started after 2h of removing LLOMe treatment. Data represent the mean  $\pm$  SEM of two out of three independent biological replicates. Values were normalised to cell number. A one-way ANOVA and Dunnett post-test were used for multiple comparisons vs BMDM WT. **(c)** Bar graphs show the basal OCR and ECAR levels of iPSDM pre-treated with Mito-Tempo (5  $\mu$ M , 1h )and left untreated or treated with 0.5 mM of LLOMe for 1 h. A one-way ANOVA and Tukey post-test were used for multiple comparisons. Values were normalised to cell number. **(d, e)** Total metabolite abundance **(d)** and lipidomics **(e)** of iPSDM untreated or treated with 0.5 mM of LLOMe for 1 h in the presence or absence of PI. Values indicate log<sub>2</sub> fold-change relative to untreated iPSDM. The number of lipids per class is indicated in red. Student's t test, n = 5 technical replicates. **(f)** Gene expression analysis using NanoString of iPSDM untreated or treated with 0.5 mM LLOMe for 1 h **(g, h)** Metabolism-related gene expression analysis using NanoString showing mitochondrial respiration- (g) or glycolysis- (h) related genes of iPSDM untreated or treated with 100  $\mu$ g/mL silica crystals for 4 h or infected with Mtb WT or Mtb  $\Delta$ RD1 for 48 h. Genes with log<sub>2</sub> fold change >1 and p  $\leq$  0.05 are shown and heatmaps indicate z-score values. Data is from one representative experiment with three technical replicates. BMP: bis(monoacylglycero)phosphate, Cer-NDS: ceramide-NDS, Cer-NS: ceramide-NS, CL: cardiolipin, DG: diacylglycerol, ether-LPC: ether-lysophosphatidylcholine, ether-LPE: ether-lysophosphatidylethanolamine, ether-PC: ether-phosphatidylcholine, ether-PE: ether-phosphatidylethanolamine, ether-PS: ether-phosphatidylserine, ether-TG: ether-triacylglycerol, LPC: lysophosphatidylcholine, LPE: lysophosphatidylethanolamine, OxTG: Oxidised Triacylglycerol, PC: phosphatidylcholine, PE: phosphatidylethanolamine, PG: phosphatidylglycerol, PI: phosphatidylinositol, PS: phosphatidylserine, SM: sphingomyelin, TG: triacylglycerol. Source data are provided as a Source Data file. See also Supplementary Table 3.

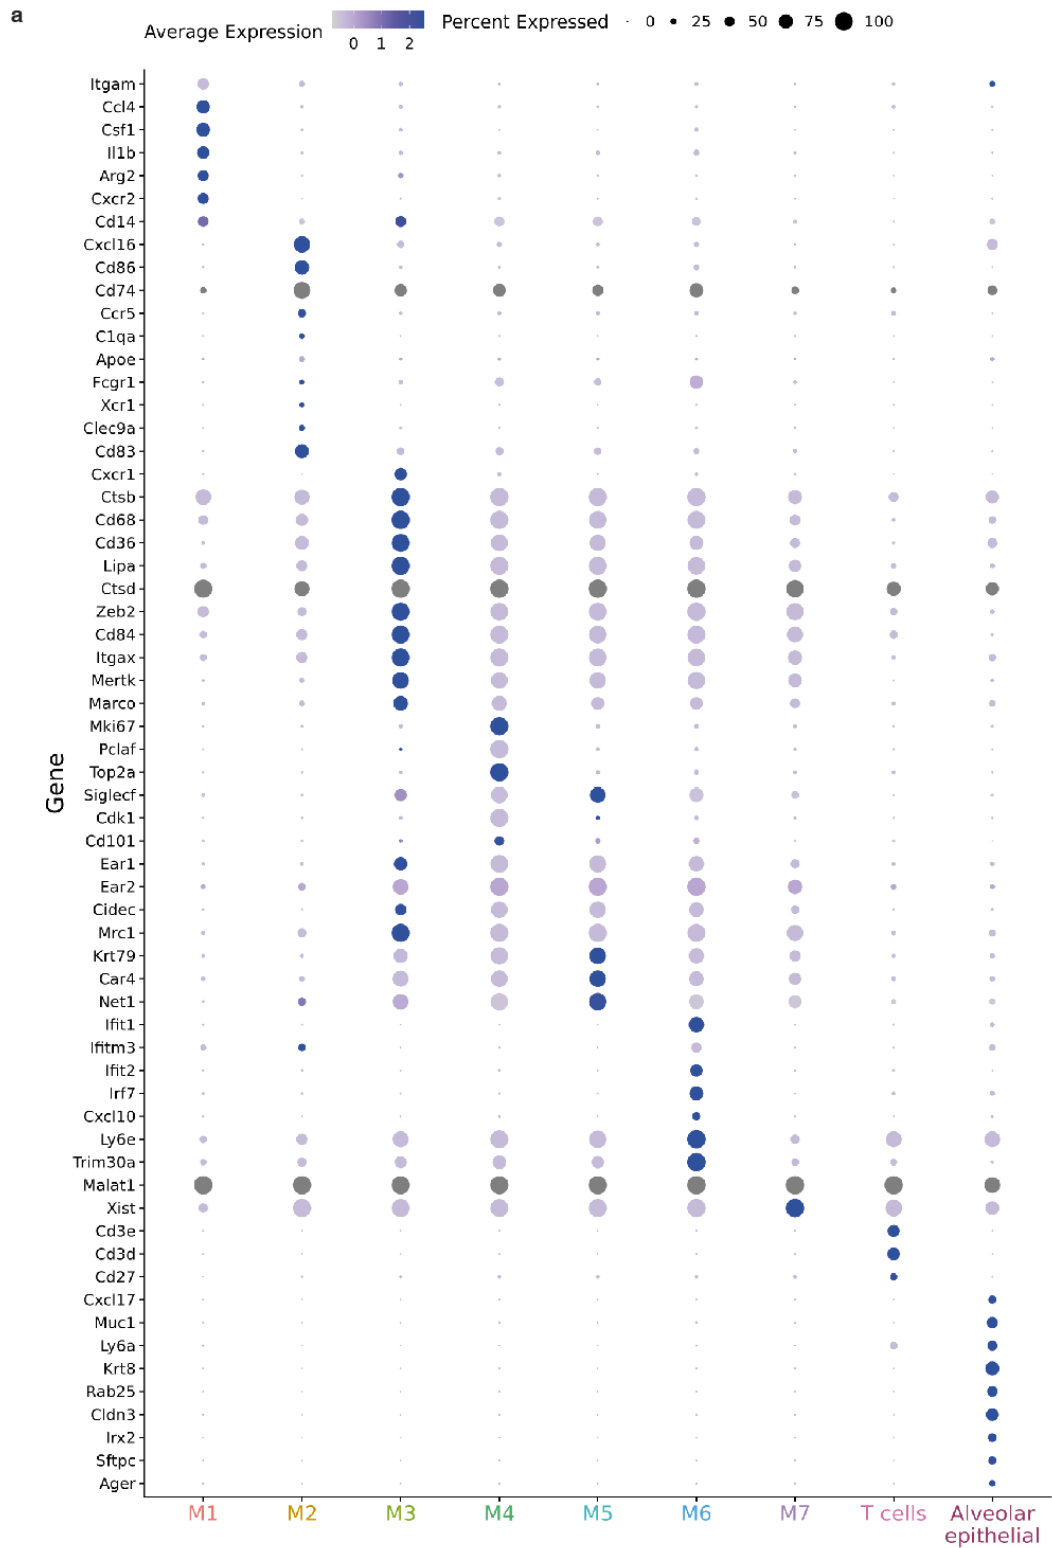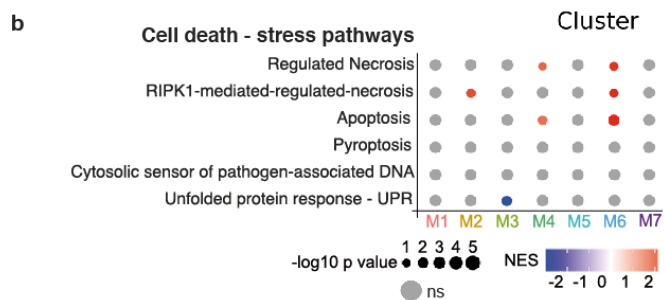

**Supplementary Figure 8- Single cell RNA-seq analysis of the lung macrophage subsets after endomembrane damage. (a)** Dot-plot showing expression levels of representative genes for each cluster **(b)** Cell death-related pathways significantly enriched by the treatment among the different macrophage populations. Source data are provided in Supplementary Table 5 and 6.

See also [https://shiny.crick.ac.uk/033\\_scrnaseq\\_airspace\\_cells\\_inflammation/865eb86c8eca0/](https://shiny.crick.ac.uk/033_scrnaseq_airspace_cells_inflammation/865eb86c8eca0/)

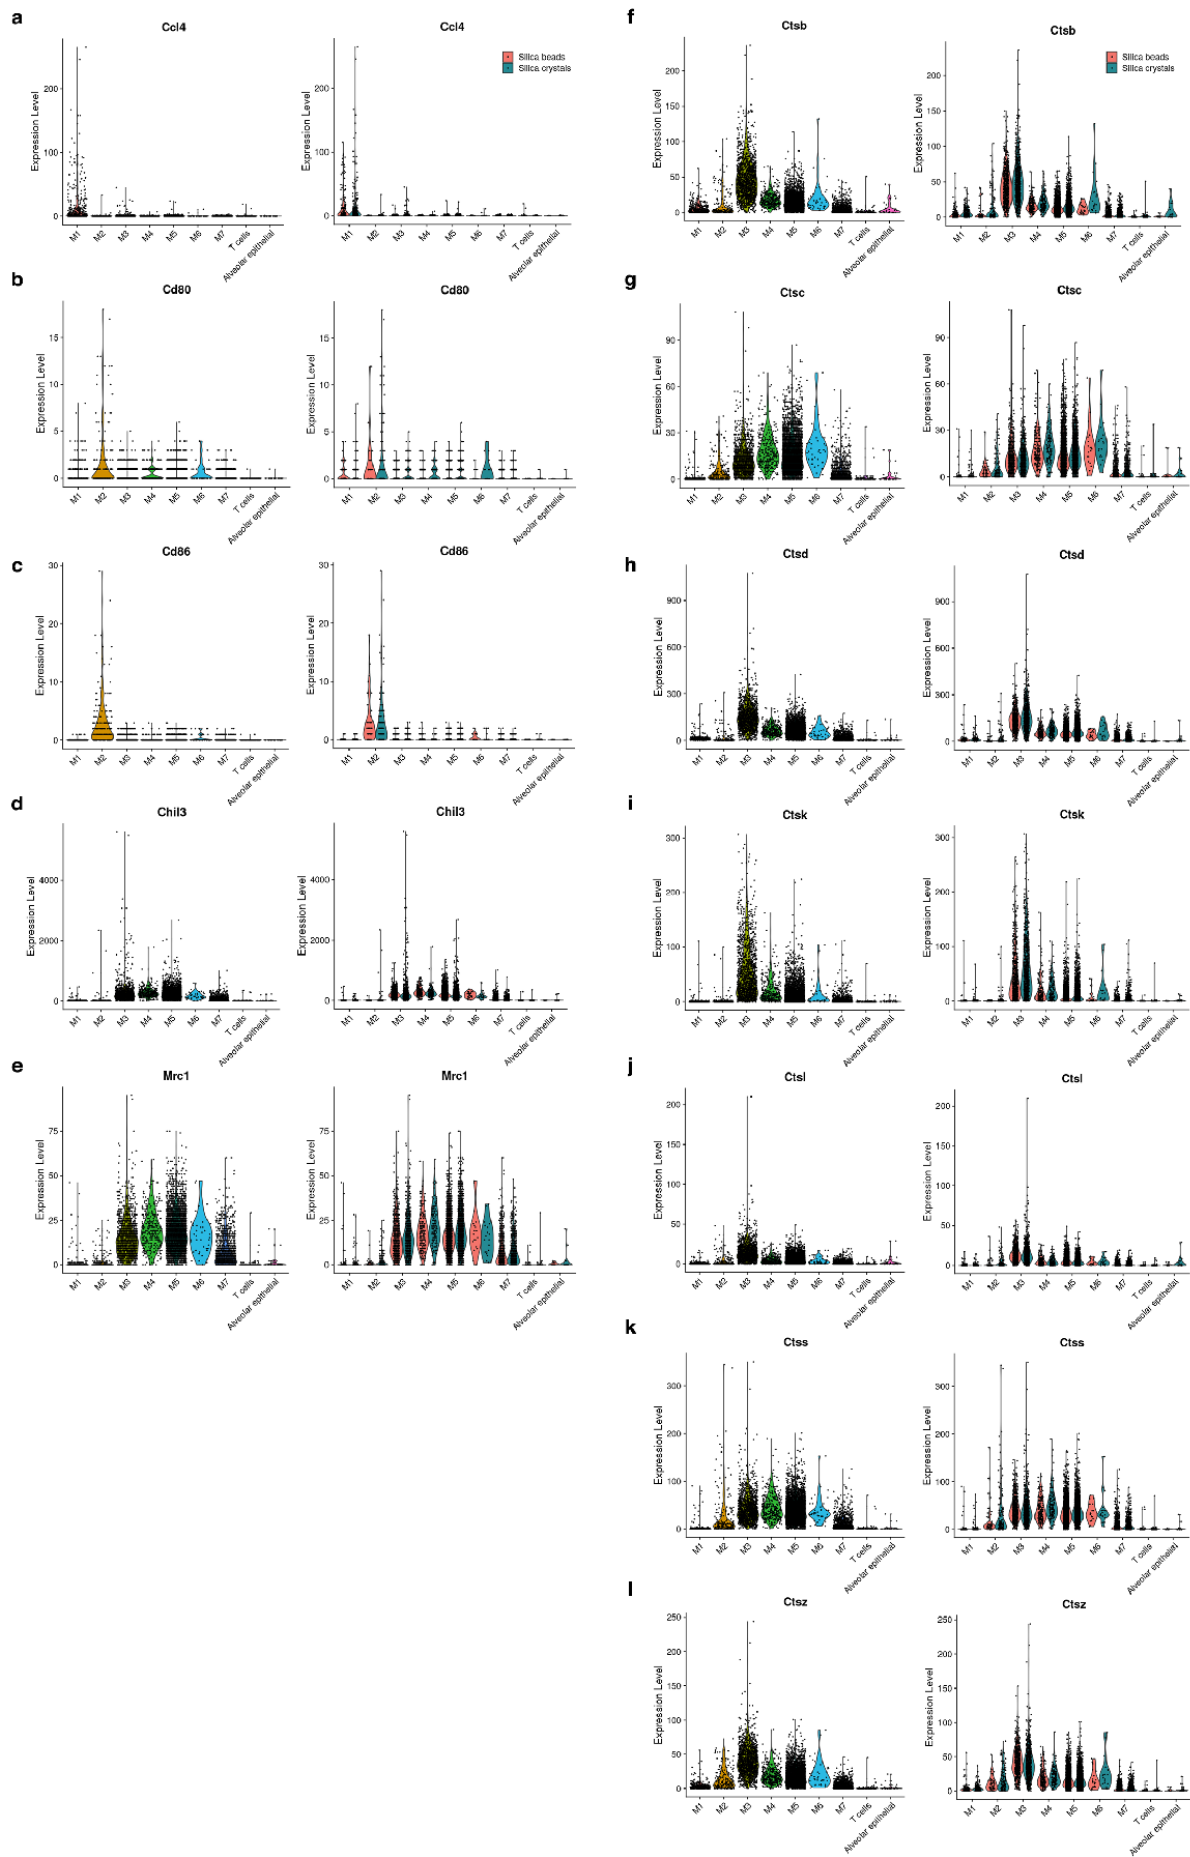



**Supplementary Figure 9. Cathepsins and M1/M2 transcript levels from the single cell RNA-seq dataset of lung macrophage subsets after endomembrane damage. (a-e)** violin plots show transcript levels per cluster (left) and experimental condition (right) of the indicated macrophage polarisation markers. **(f-l)** violin plots show transcript levels per cluster (left) and experimental condition (right) of the indicated lysosomal cathepsins. Source data are provided in Supplementary Table 5 and 6.

See also [https://shiny.crick.ac.uk/033\\_scrnaseq\\_airspace\\_cells\\_inflammation/865eb86c8eca0/](https://shiny.crick.ac.uk/033_scrnaseq_airspace_cells_inflammation/865eb86c8eca0/)



## **Supplementary Table 1. Comparative analysis of mitochondrial processes using the iPSDM MITO-tag dataset.**

### **Heatmap I**

Log<sub>2</sub> fold change of mitochondrial proteins involved in oxidative phosphorylation (A) and translation in mitochondria (B) for each indicated comparison,  $p < 0.05$ . Of note that the overall mitochondrial protein decrease observed after LLOMe treatment is rescued in the presence of a protease inhibitor (PI) (seen as a positive Log<sub>2</sub> fold change value in the LLOMe+PI vs LLOMe comparison). The MITO-tag data was analysed using mitoXplorer 2.0<sup>1</sup> (<http://mitoxplorer2.ibdm.univ-mrs.fr/>)

### **Heatmap II**

Log<sub>2</sub> fold change of mitochondrial proteins involved in oxidative phosphorylation (A) and translation in mitochondria (B) for each indicated comparison,  $p < 0.05$ . Of note that the overall mitochondrial protein decrease observed after LLOMe treatment is rescued in the presence of a protease inhibitor (PI) (seen as a positive Log<sub>2</sub> fold change value in the LLOMe+PI vs LLOMe, and Untreated vs LLOMe comparisons). The MITO-tag data was analysed using mitoXplorer 2.0 (<http://mitoxplorer2.ibdm.univ-mrs.fr/>)

1. Marchiano, F., Haering, M. & Habermann, B.H. The mitoXplorer 2.0 update: integrating and interpreting mitochondrial expression dynamics within a cellular context. *Nucleic Acids Res* (2022).

## Heatmap I

A

## Oxidative phosphorylation

LLOMe vs Untreated

LLOMe + PI vs LLOMe

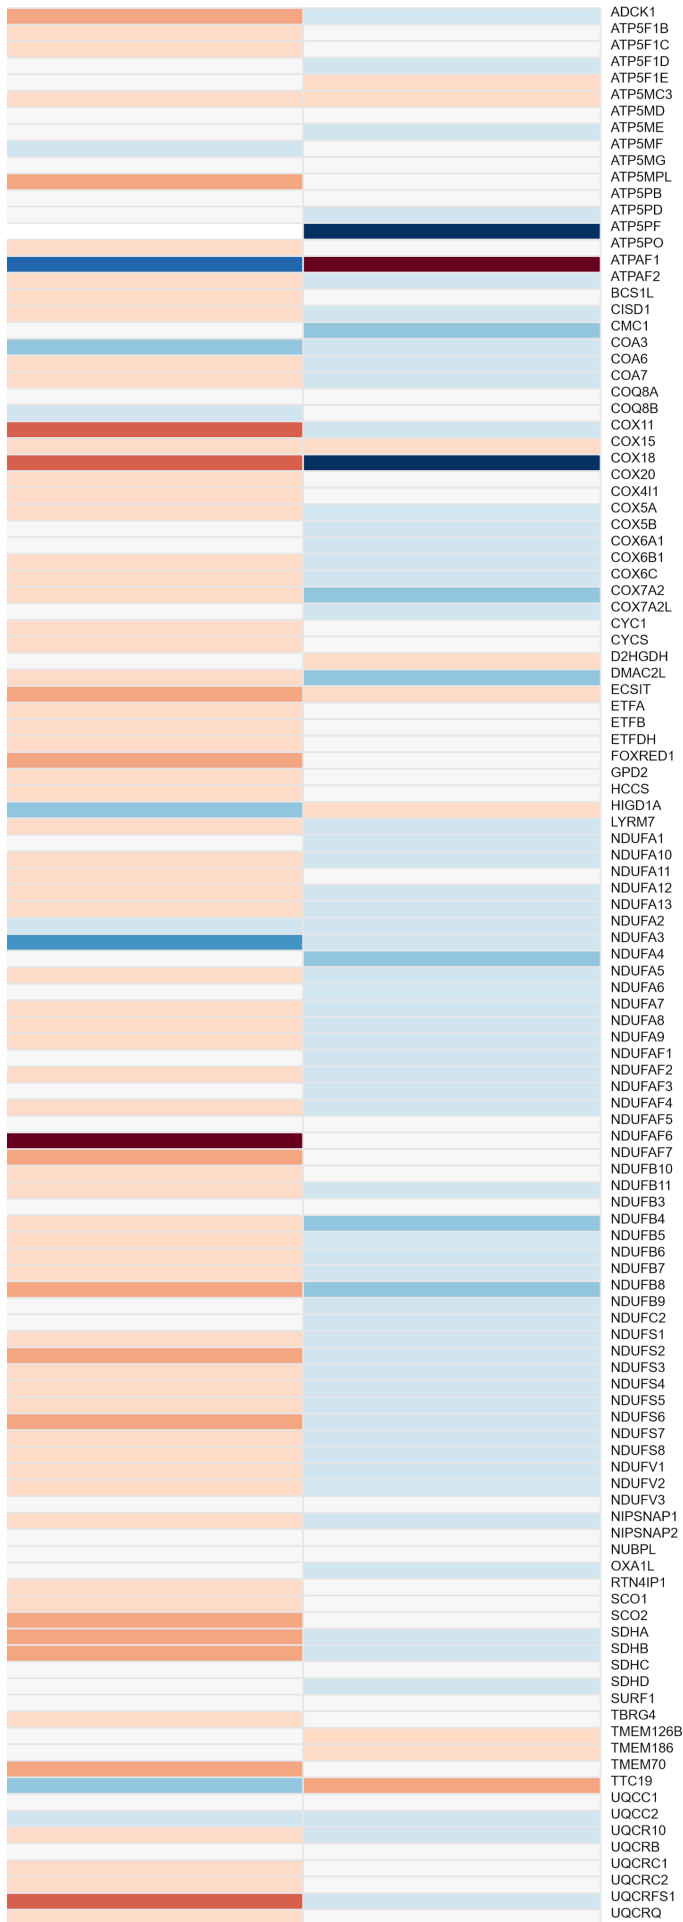

B

## Translation

LLOMe vs Untreated

LLOMe + PI vs LLOMe

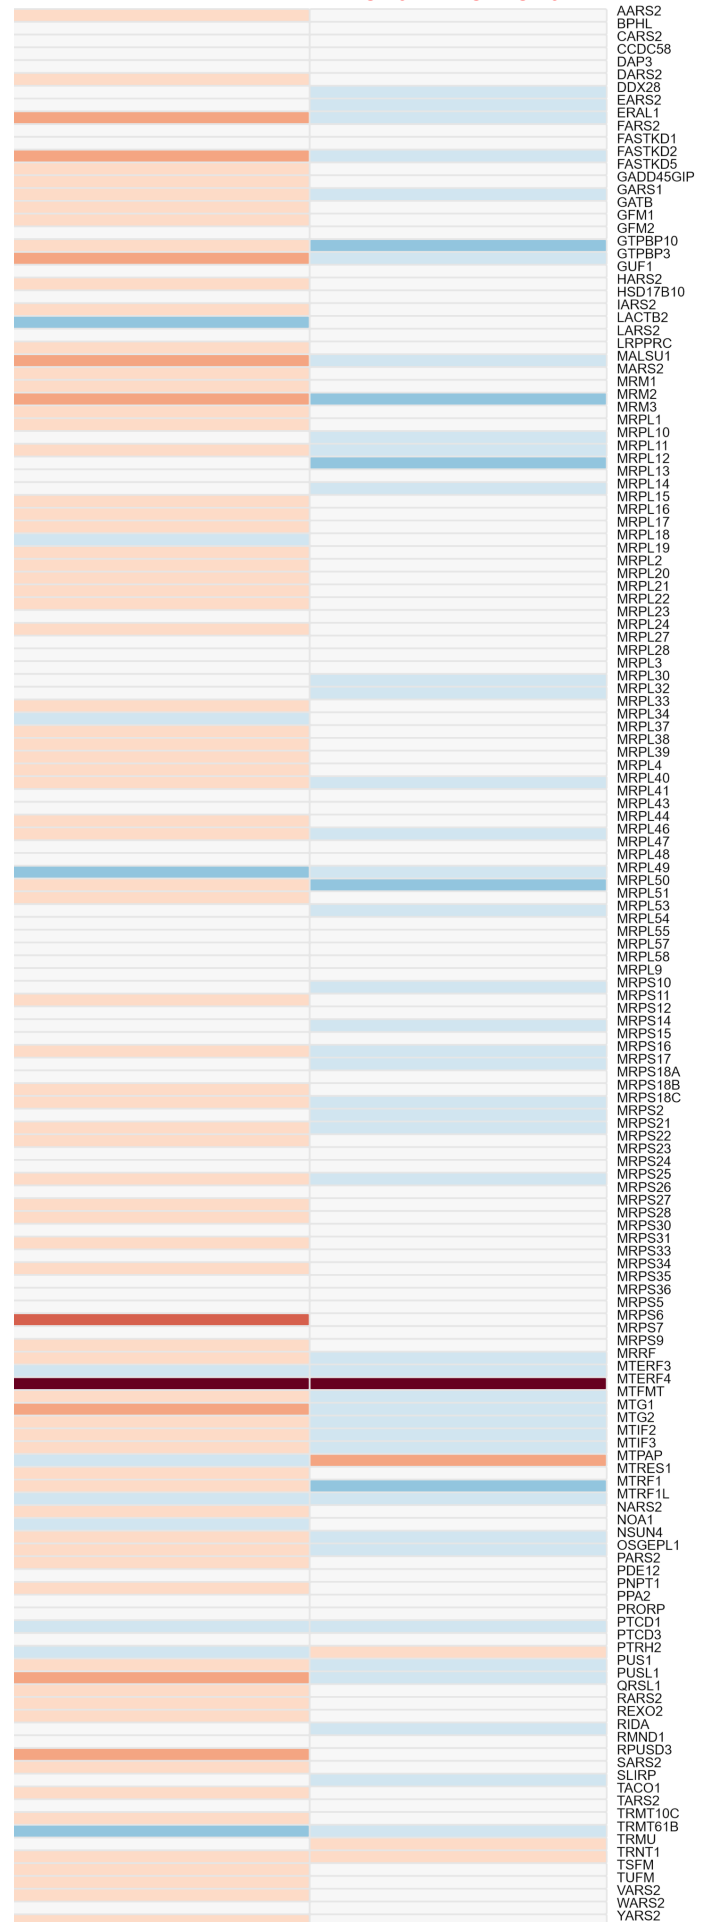

&lt;-2

-2

0

Log 2 fold change

2

&gt;2

Heatmap II

A

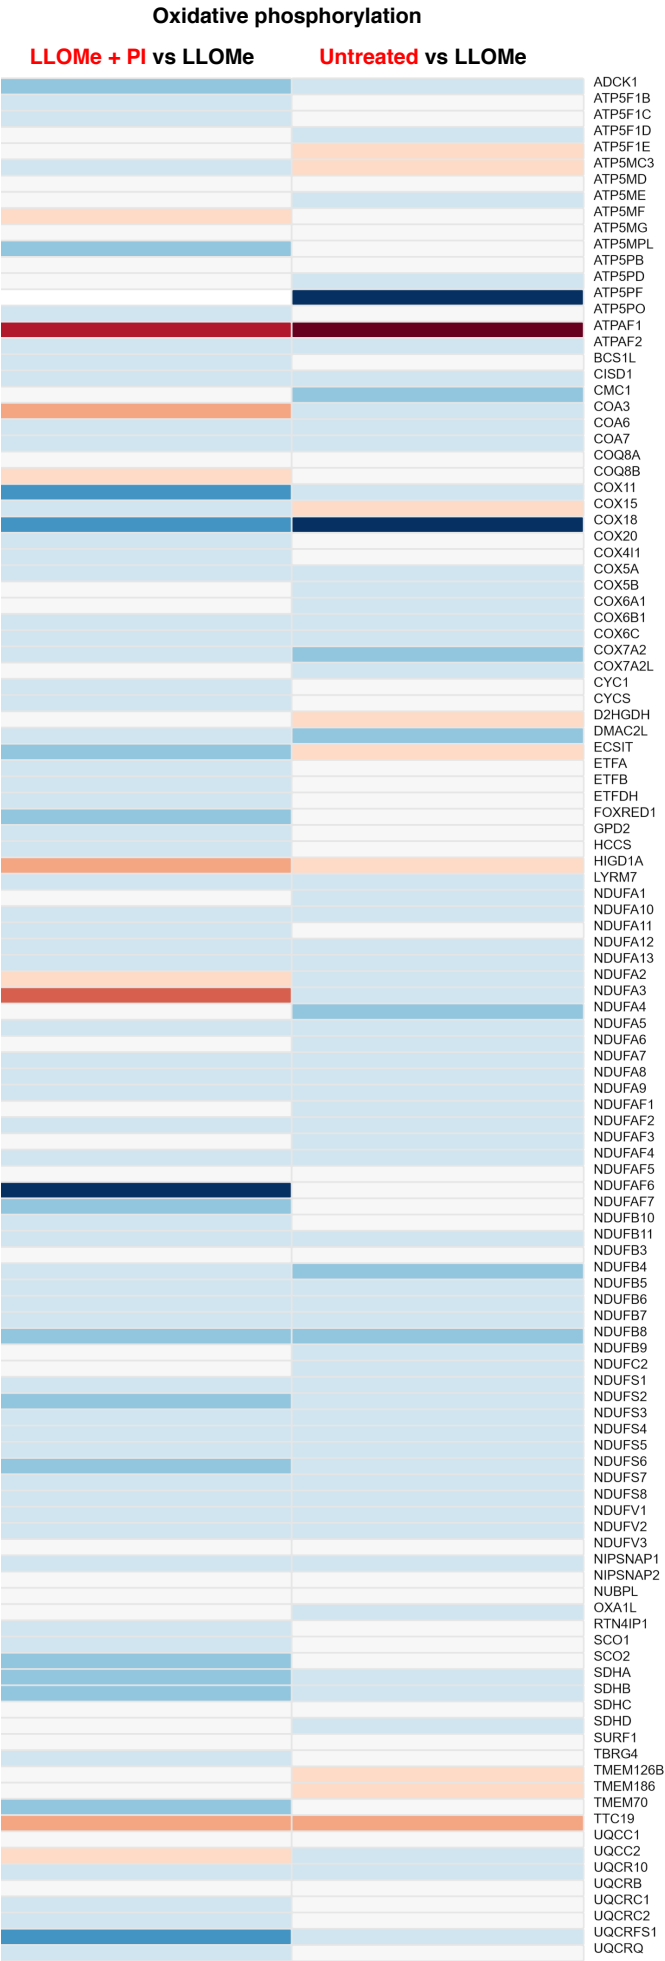

B

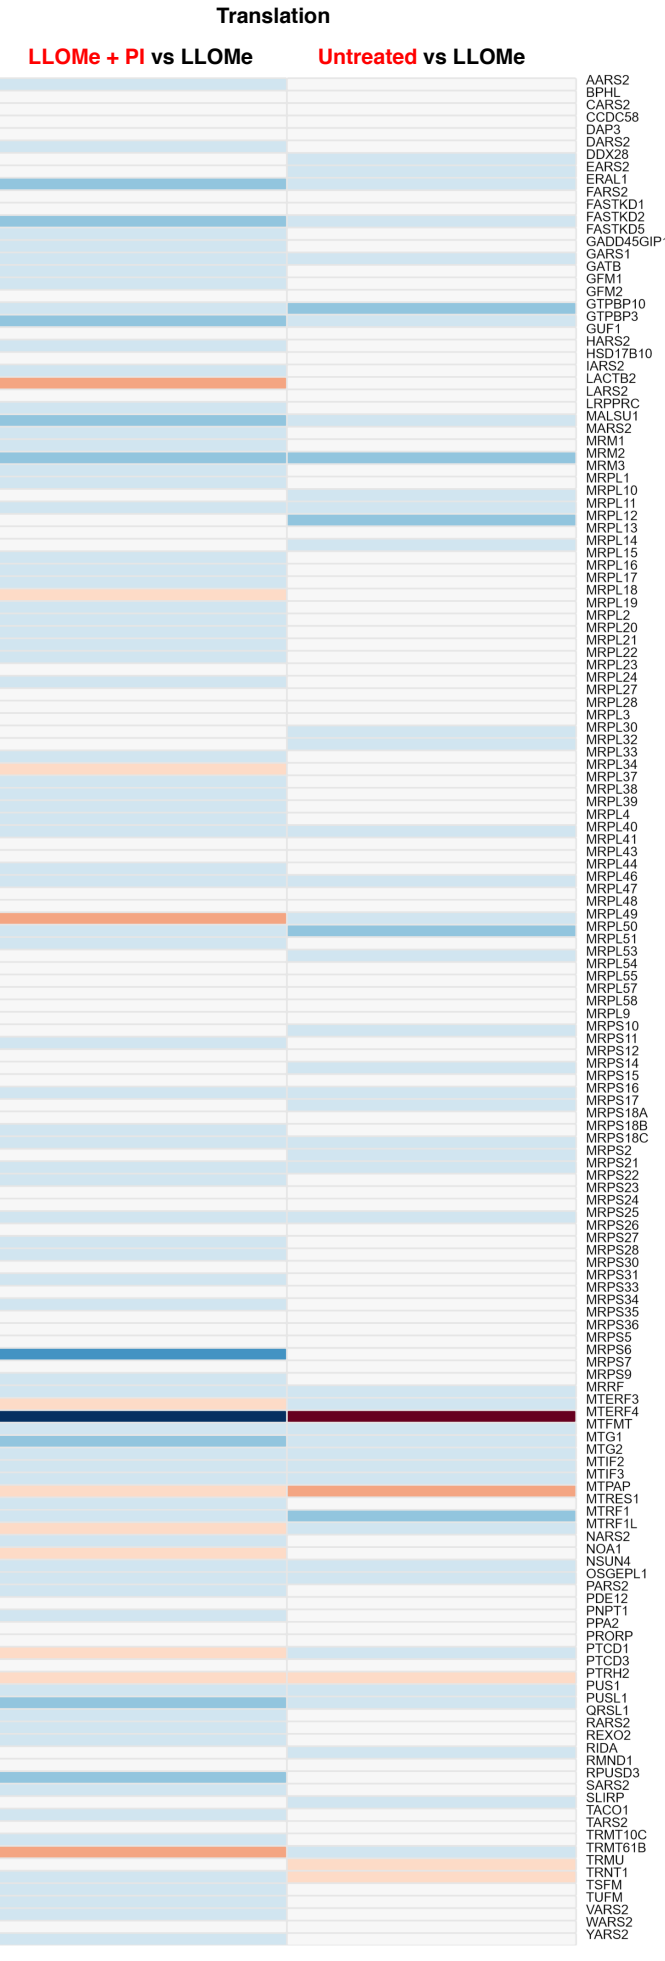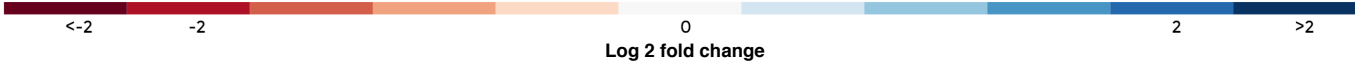

**Supplementary Table 2.** References used to annotate the main clusters identified by Single cell RNA sequencing of BAL samples.

| Cluster             | Representative genes                                                 | Reference |
|---------------------|----------------------------------------------------------------------|-----------|
| M1                  | Itgam, Ccl4, Csf1, Il1b, Arg2, Cxcr2, Cd14                           | 1-3       |
| M2                  | Cxcl16, Cd86, Cd74, Ccr5, C1qa, Apoe, Fcgr1, Xcr1, Clec9a, Cd83      | 1, 3      |
| M3                  | Cxcr1, Ctsb, Cd68, Cd36, Lipa, Ctsd, Zeb2, Cd84, Itgax, Mertk, Marco | 2-4       |
| M4                  | Mki67, Pclaf, Top2a, SiglecF, Cdk1, Cd101, Marco                     | 1, 5      |
| M5                  | SiglecF, Ear1, Ear2, Cidec, Mrc1, Krt79, Car4, Net1, Marco           | 2, 3, 5   |
| M6                  | Ifit1, Ifitm3, Ifit2, Irf7, Cxcl10, Ly6e, Trim30a                    | 2         |
| M7                  | Xist, Zeb2, Mrc1                                                     | 2, 6-8    |
| Alveolar epithelial | Cxcl17, Muc1, Ly6a, Krt8, Cldn3, Irx2, Sfptc, Ager                   | 5         |
| T cells             | Cd3e, Cd3d, Cd27                                                     | 5         |

1. Mould, K.J., Jackson, N.D., Henson, P.M., Seibold, M. & Janssen, W.J. Single cell RNA sequencing identifies unique inflammatory airspace macrophage subsets. *JCI Insight* **4** (2019).
2. Scott, C.L. *et al.* The Transcription Factor ZEB2 Is Required to Maintain the Tissue-Specific Identities of Macrophages. *Immunity* **49**, 312-325 e315 (2018).
3. Zilionis, R. *et al.* Single-Cell Transcriptomics of Human and Mouse Lung Cancers Reveals Conserved Myeloid Populations across Individuals and Species. *Immunity* **50**, 1317-1334 e1310 (2019).
4. Huang, S.C. *et al.* Cell-intrinsic lysosomal lipolysis is essential for alternative activation of macrophages. *Nat Immunol* **15**, 846-855 (2014).
5. Travaglini, K.J. *et al.* A molecular cell atlas of the human lung from single-cell RNA sequencing. *Nature* **587**, 619-625 (2020).
6. Wang, H. *et al.* The Long Non-Coding RNA XIST Controls Non-Small Cell Lung Cancer Proliferation and Invasion by Modulating miR-186-5p. *Cell Physiol Biochem* **41**, 2221-2229 (2017).
7. Sun, Y. & Xu, J. TCF-4 Regulated lncRNA-XIST Promotes M2 Polarization Of Macrophages And Is Associated With Lung Cancer. *Onco Targets Ther* **12**, 8055-8062 (2019).
8. Xu, X. *et al.* Silencing of lncRNA XIST inhibits non-small cell lung cancer growth and promotes chemosensitivity to cisplatin. *Aging (Albany NY)* **12**, 4711-4726 (2020).
